# Supplementary material for: Optimization of protoplast regeneration in the model plant Arabidopsis thaliana
Source: PubMed Central journal article supplement (PMC7901198; doi:10.1186/s13007-021-00720-x), 2021-02-23
Supplement: 13007_2021_720_MOESM1_ESM.pdf [file 13007_2021_720_MOESM1_ESM.pdf]

# Additional file 1

## Reagents used in study

- Viscozyme L (Novozymes, cat. no. SP079)
- Pectinex Ultra SP-L (Novozymes, cat. no. 1043-70)
- Celluclast 1.5L (Novozymes, cat. no. SP011)
- MES monohydrate (Duchefa Biochemie, cat. no. M1503)
- $\text{CaCl}_2$  (Junsei, cat. no. 18235-0301)
- $\text{MgSO}_4 \cdot 7\text{H}_2\text{O}$  (Merck, cat. no. 1.05886)
- L(+)-Glutamine (Junsei, cat. no. 27340-0310)
- D-mannitol (Junsei, cat. no. 70220-0301)
- NaOH (Sigma-Aldrich, cat. no. S8045)
- Sucrose (Sigma-Aldrich, cat. no. S1888)
- D-glucose (Sigma-Aldrich, cat. no. G7021)
- Coconut water (Sigma-Aldrich, cat. no. C5915)
- Sodium alginate (Sigma-Aldrich, cat. no. A0682)
- Plant agar (Duchefa Biochemie, cat. no. P1001)
- Gamborg B5 medium including vitamins (Duchefa Biochemie, Cat. no. G0210)
- Murashige & Skoog medium including vitamins (Duchefa Biochemie, Cat. no. M0222)
- Myo-inositol (Duchefa Biochemie, cat. no. I0609)
- 6-Benzylaminopurine (6-BAP) (Duchefa Biochemie, cat. no. B0904)
- $\alpha$ -Naphthalene acetic acid ( $\alpha$ -NAA) (Duchefa Biochemie, cat. no. N0903)
- Indole-3-butyric acid (IBA) (Duchefa Biochemie, cat. no. I0902)
- Indole-3-acetic acid (IAA) (Duchefa Biochemie, cat. no. I0901)
- 6-( $\gamma,\gamma$ -Dimethylallylamino)purine (2-ip) (Sigma-Aldrich, cat. no. D7674)
- 2,4-Dichlorophenoxyacetic acid (2,4-D) (Duchefa Biochemie, cat. no. D0911)
- Ethanol (Merck, cat. no. 8.18760)
- Triton X-100 (Sigma-Aldrich, cat. no. T9284)

## Additional file 1. Chemicals used in study
