# Supplementary material for: Optimization of protoplast regeneration in the model plant Arabidopsis thaliana
Source: PubMed Central journal article supplement (PMC7901198; doi:10.1186/s13007-021-00720-x), 2021-02-23
Supplement: 13007_2021_720_MOESM4_ESM.pdf [file 13007_2021_720_MOESM4_ESM.pdf]

## Additional file 4

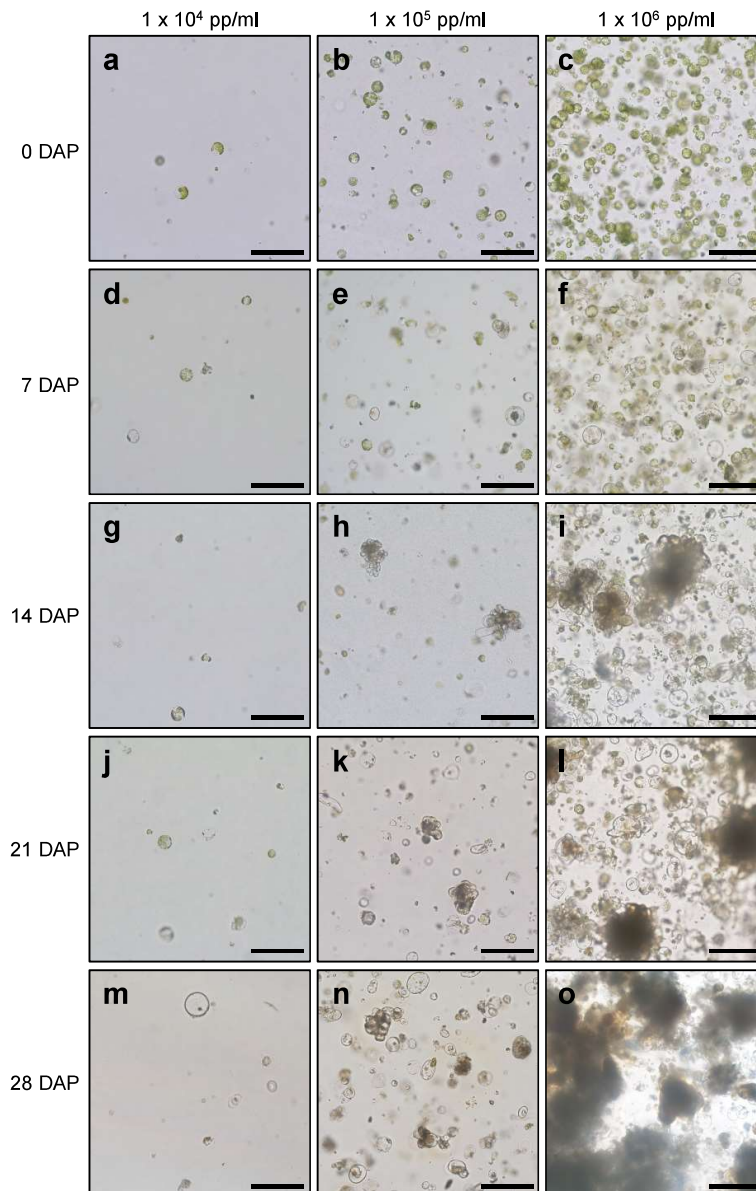

### Additional file 4. Effect of protoplast density in alginate hydrogels on protoplast division.

Protoplast images were taken at the indicated time points (days) after incubation in PIM (DAP): 0 DAP (a–c), 7 DAP (d–f), 14 DAP (g–i), 21 DAP (j–l), and 28 DAP (m–o). Scale bars = 200  $\mu$ m. DAP, days after incubation in protoplast induction medium (PIM); pp, protoplasts.
