# Supplementary material for: Optimization of protoplast regeneration in the model plant Arabidopsis thaliana
Source: PubMed Central journal article supplement (PMC7901198; doi:10.1186/s13007-021-00720-x), 2021-02-23
Supplement: 13007_2021_720_MOESM5_ESM.pdf [file 13007_2021_720_MOESM5_ESM.pdf]

## Additional file 5

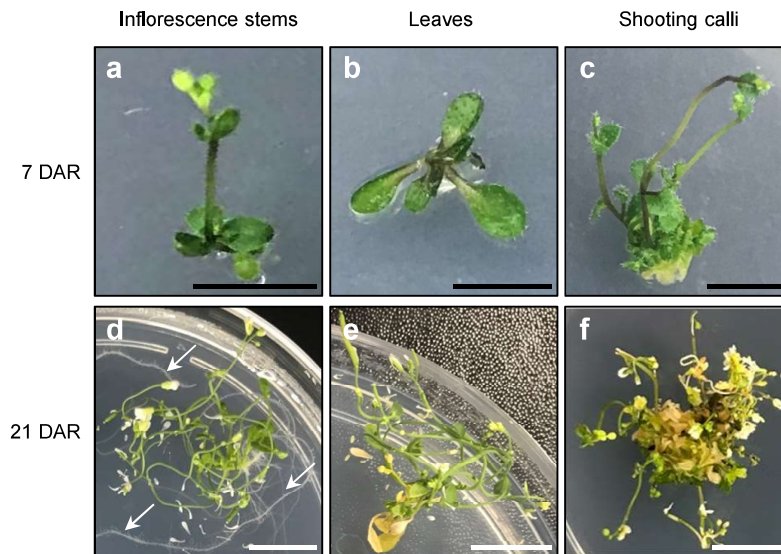

### Additional file 5. *De novo* root regeneration efficiency of different tissues.

Regenerated inflorescence stems (a), vegetative leaves (b), and shooting calli (c) were excised and incubated on RM. Images of *de novo* root regeneration for each tissue (d-f) were taken at the 21 days after incubation on RM (DAR). Arrows indicate *de novo* regenerated roots. Black scale bars = 5 mm; White scale bars = 1 cm.
