# Supplementary material for: Optimization of protoplast regeneration in the model plant Arabidopsis thaliana
Source: PubMed Central journal article supplement (PMC7901198; doi:10.1186/s13007-021-00720-x), 2021-02-23
Supplement: 13007_2021_720_MOESM6_ESM.pdf [file 13007_2021_720_MOESM6_ESM.pdf]

## Additional file 6

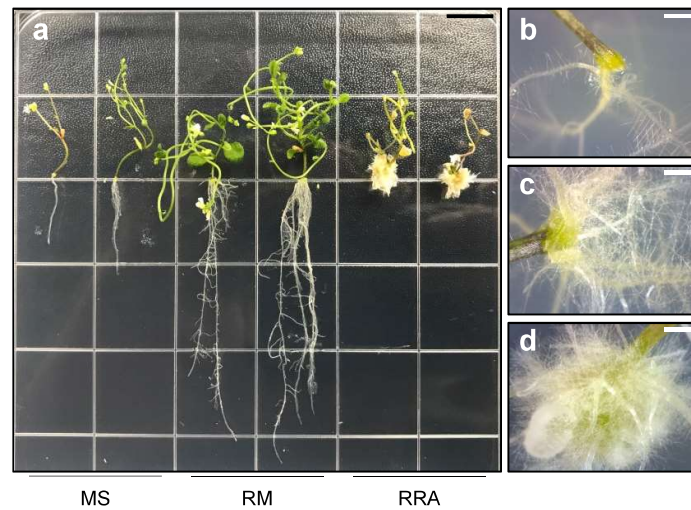

**Additional file 6. *De novo* root regeneration of inflorescence explants on three different root induction media.**

(a) Regenerated inflorescence stems of *Arabidopsis* ecotype Ws-2 on three different root induction media. The inflorescence stems of Ws-2 were excised and incubated on each indicated root induction medium for 2 weeks. Enlarged root images on MS (b), RM (c), and RRA (d) are shown. Black scale bars = 1 cm; white scale bars = 1 mm.
